# Supplementary material for: Paternal Methyl Donor Supplementation in Rats Improves Fertility, Physiological Outcomes, Gut Microbial Signatures and Epigenetic Markers Altered by High Fat/High Sucrose Diet
Source: PubMed Central journal article supplement (PMC7826956; doi:10.3390/ijms22020689), 2021-01-12
Supplement: ijms-22-00689-s001.pdf [file ijms-22-00689-s001.pdf]

**Table S1** Organ Weights of Fathers and Adult Offspring at euthanasia

|                         | HF/S        | HF/S+M      | p-value |
|-------------------------|-------------|-------------|---------|
| <b>Fathers</b>          |             |             |         |
| Body Weight (g)         | 651.6±21.2  | 614.7±21.9  | 0.20    |
| Organ weight (% BW)     |             |             |         |
| Heart                   | 0.27±0.01   | 0.28±0.01   | 0.38    |
| Liver                   | 3.00±0.08   | 2.99±0.08   | 0.75    |
| Kidney                  | 0.29±0.01   | 0.29±0.01   | 0.26    |
| Cecum                   | 0.09±0.003  | 0.10±0.004  | 0.70    |
| Colon                   | 0.21±0.01   | 0.22±0.01   | 0.78    |
| Testes                  | 0.29±0.01   | 0.29±0.01   | 0.86    |
| <b>Male Offspring</b>   |             |             |         |
| Body Weight (g)         | 666.9±6.2   | 672±22.7    | 0.20    |
| Organ weight (% BW)     |             |             |         |
| Heart                   | 0.28±0.01   | 0.27±0.01   | 0.30    |
| Liver                   | 2.70±0.07   | 2.67±0.04   | 0.90    |
| Kidney                  | 0.252±0.005 | 0.251±0.008 | 0.07    |
| Cecum                   | 0.09±0.003  | 0.11±0.004  | 0.09    |
| Colon                   | 0.17±0.01   | 0.19±0.004  | 0.91    |
| Testes                  | 0.30±0.01   | 0.28±0.01   | 0.58    |
| <b>Female Offspring</b> |             |             |         |
| Body Weight (g)         | 405.2±21.2  | 388.8±14.3  | 0.40    |
| Organ weight (% BW)     |             |             |         |
| Heart                   | 0.30±0.01   | 0.30±0.01   | 0.29    |
| Liver                   | 2.59±0.05   | 2.79±0.12   | 0.07    |
| Kidney                  | 0.26±0.01   | 0.26±0.01   | 0.47    |
| Cecum                   | 0.12±0.01   | 0.11±0.01   | 0.75    |
| Colon                   | 0.20±0.01   | 0.13±0.01   | 0.41    |

Values are means ± SEM, *n* = 8-13. Male offspring heart and female kidney were log transformed for statistical analysis.

**Table S2** Alpha Diversity at 3 Weeks of Age

|                         | HF/S         | HF/S+M       | p-value |
|-------------------------|--------------|--------------|---------|
| <b>Paternal</b>         |              |              |         |
| Chao1                   | 269.77±11.47 | 257.04±13.85 | 0.49    |
| Shannon                 | 3.96±0.07    | 3.85±0.12    | 0.46    |
| Simpson                 | 0.95±0.004   | 0.94±0.01    | 0.47    |
| <b>Male Offspring</b>   |              |              |         |
| Chao1                   | 123.75±9.16  | 150.53±19.24 | 0.25    |
| Shannon                 | 3.77±0.05    | 3.83±0.08    | 0.50    |
| Simpson                 | 0.96±0.003   | 0.96±0.004   | 0.86    |
| <b>Female Offspring</b> |              |              |         |
| Chao1                   | 179.27±20.31 | 173.33±11.55 | 0.80    |
| Shannon                 | 3.78±0.06    | 3.72±0.06    | 0.56    |
| Simpson                 | 0.95±0.003   | 0.95±0.004   | 0.29    |

Values are means ± SEM,  $n = 8-13$ .

**Table S3** Alpha Diversity- Week 12 for Fathers and Week 15 for offspring

|                         | HF/S         | HF/S+M       | p-value |
|-------------------------|--------------|--------------|---------|
| <b>Paternal</b>         |              |              |         |
| Chao1                   | 191.48±23.52 | 153.09±21.42 | 0.24    |
| Shannon                 | 4.00±0.1     | 3.77±0.11    | 0.14    |
| Simpson                 | 0.96±0.003   | 0.95±0.004   | 0.11    |
| <b>Male Offspring</b>   |              |              |         |
| Chao1                   | 140.53±8.79  | 153.39±16.61 | 0.52    |
| Shannon                 | 3.89±0.09    | 3.73±0.14    | 0.36    |
| Simpson                 | 0.96±0.004   | 0.94±0.01    | 0.20    |
| <b>Female Offspring</b> |              |              |         |
| Chao1                   | 148.47±23.18 | 154.35±16.67 | 0.86    |
| Shannon                 | 3.64±0.13    | 3.64±0.17    | 0.98    |
| Simpson                 | 0.95±0.01    | 0.94±0.01    | 0.55    |

Values are means ± SEM,  $n = 8-13$ .

**Table S4:** Experimental diet composition from weeks 3-9 and 10-16

|                                 | HF/S             | HF/S+M | HF/S               | HF/S+M |
|---------------------------------|------------------|--------|--------------------|--------|
| <b>g/kg</b>                     | <b>Weeks 3-9</b> |        | <b>Weeks 10-16</b> |        |
| <b>Casein</b>                   | 240              | 237.5  | 200                | 197.9  |
| <b>Sucrose</b>                  | 459.5            | 454.7  | 499.5              | 494.3  |
| <b>Soybean Oil</b>              | 100              | 99     | 100                | 99     |
| <b>Lard</b>                     | 100              | 99     | 100                | 99     |
| <b>Alphacel</b>                 | 50               | 49.5   | 50                 | 49.5   |
| <b>AIN-93M Mineral Mix</b>      | 35               | 34.6   | 35                 | 34.6   |
| <b>AIN-93 VX Vitamin Mix</b>    | 10               | 9.9    | 10                 | 9.9    |
| <b>DL-Methionine</b>            | 3                | 2.97   | 3                  | 2.97   |
| <b>Choline-Bitartrate</b>       | 2.5              | 2.47   | 2.5                | 2.47   |
| <b>Betaine</b>                  | 0                | 5      | 0                  | 5      |
| <b>Choline (CDP choline)</b>    | 0                | 5.37   | 0                  | 5.37   |
| <b>Folic Acid</b>               | 0                | 0.0055 | 0                  | 0.0055 |
| <b>Vitamin B12</b>              | 0                | 0.0005 | 0                  | 0.0005 |
| <b>Energy density (kJ/g)</b>    | 19.3             | 19.1   | 19.3               | 19.1   |
| <b>Carbohydrate (% of kcal)</b> | 49.8             | 49.3   | 49.8               | 49.3   |
| <b>Protein (% of kcal)</b>      | 11.1             | 11.0   | 11.1               | 11.0   |
| <b>Fat (% of kcal)</b>          | 39.1             | 38.7   | 39.1               | 38.7   |

The digestible energy of high fat/ sucrose diets was 4.58 kcal/g and 4.6 kcal/g for the 3-9 and 10-16 week formulations respectively. Diets were purchased from Dyets, Inc. (Bethlehem, PA, USA). Methyl donors (Betaine, Choline, Folic Acid and Vitamin B12) were purchased from Sigma Aldrich (Oakville, ON, Canada).

**Table S5** Amplicon Context Sequence for DNMTs in adipose tissue

| Gene                  | Amplicon Context Sequence                                                                                                                           |
|-----------------------|-----------------------------------------------------------------------------------------------------------------------------------------------------|
| <b>Adipose Tissue</b> |                                                                                                                                                     |
| DNMT1                 | ATCGTCCTTAGCGTCGTCGTAACCTTTCTACCTGGCTCACCA<br>CAAACCTGGGCATGGCGTAGGAGGGAGTCCTCGGTGAACCGG<br>TTCACATTGATGGCAGAAGAGGAA CAGTGGTCTCGATCTTA<br>TTGATCAAG |
| DNMT3a                | GAATGATAAGCTGGAGTTGCAAGAGTGTCTGGAACACGGC<br>AGAATAGCCAGTTCAGCAAAGTGAGGACCATTACCACCAG<br>GTCAAACCTCCATA                                              |
| DNMT3b                | TTCAGGCAGTAGGAACTTAGAAGCCAGGAGACGCGAGAACA<br>AAAGTCGAGAC GCACAACCATTGACTTTGCCGCTTCTGAGTA<br>CTCCACACCCC                                             |
| 18S                   | <b>Forward (5'→3')</b> TGACTCAACACGGGAAACC<br><b>Reverse (3'→5')</b> TCGCTCCACCAACTAAGAAC                                                           |

18S was used as the housekeeping gene.

**Table S6** Universal primer sequences for microRNA in liver tissue

| microRNA              | Universal Primer             |
|-----------------------|------------------------------|
| <b>Liver</b>          |                              |
| Rn_miR-21_2           | CTAGCTTATCAGACTGATGTTG       |
| Rn_miR-24_1           | TGGCTCAGTTCAGCAGGAAC         |
| Rn_miR-33_2           | GTGCATTGTAGTTGCATTGCA        |
| Rn_miR-34a_1          | TGGCAGTGTCTTAGCTGGTTG        |
| Rn_miR-103_2          | AGCAGCATTGTACAGGGCTATG       |
| Rn_miR-107_2          | AGCAGCATTGTACAGGGCTATC       |
| Rn_miR-122a_1         | TGGAGTGTGACAATGGTGTTT        |
| Rn_miR-130a_1         | CAGTGCAATGTTAAAAGGGC         |
| Rn_miR-143_1          | TGAGATGAAGCACTGTAGCT         |
| <b>Hs_SNORD68_11</b>  | <b>TTTGAACCCTTTTCCATCTG</b>  |
| <b>Hs_SNORD96A_11</b> | <b>GACATGTCCTGCAATTCTGAA</b> |

Hs\_SNORD68\_11 and Hs\_SNORD96A\_11 were used as controls.
